# Supplementary material for: Extinction Effect of Foliar Dust Retention on Urban Vegetation as Estimated by Atmospheric PM10 Concentration in Shenzhen, China
Source: MDPI journal article supplement (doi:10.3390/rs14205103), 2022-10-12

Supplementary materials for

# Extinction Effect of Foliar Dust Retention on Urban Vegetation as Estimated by Atmospheric PM10 Concentration in Shenzhen, China

Contents of this file

**Table S1.** Main technical indexes of GaoFen-4 camera.

**Table S2.** Detailed information of all stations and their fitting lines. Latitude and longitude are picked up in the WGS84 coordinate system; Plants are all evergreen.

**Figure S1.** Fitting curves of 14 stations between their atmospheric PM10 concentrations and the normalized difference vegetation index ( $\delta$ NDVI). They were separated from

Figure 4.

Table S1. Main technical indexes of GaoFen-4 camera.

| Type                            | Band | Central wavelength ± full width at half<br>maximum (μm) | Spatial resolution | revisit Time |
|---------------------------------|------|---------------------------------------------------------|--------------------|--------------|
| visible light/<br>near-infrared | 1    | 0.553±0.45                                              | 50 m               | 20 s         |
|                                 | 2    | 0.519±0.07                                              |                    |              |
|                                 | 3    | 0.550±0.08                                              |                    |              |
|                                 | 4    | 0.628±0.06                                              |                    |              |
|                                 | 5    | 0.770±0.14                                              |                    |              |
| middle-<br>infrared             | 6    | 3.8±0.6                                                 | 400 m              | 20 s         |

**Table S2.** Detailed information of all stations’ data and fitting lines. Latitude and longitude are picked up in the WGS84 coordinate system; Plants are all evergreen.

| Num | Name         | Abbreviation | n | Atmospheric PM10 concentration |          |          |          |          |          |          |          |          |
|-----|--------------|--------------|---|--------------------------------|----------|----------|----------|----------|----------|----------|----------|----------|
|     |              |              |   | Period 1                       | Period 2 | Period 3 | Period 4 | Period 5 | Period 6 | Period 7 | Period 8 | Period 9 |
| 1   | Nanhai       | NH01         | 9 | 83.00                          | 110.80   | 100.64   | 61.00    | 46.25    | 29.00    | 37.38    | 36.55    | 54.50    |
| 2   | Huaqiaocheng | HQ01         | 9 | 63.83                          | 71.40    | 78.79    | 48.57    | 36.75    | 25.89    | 33.63    | 31.27    | 44.75    |
| 3   | Henggang     | HG01         | 9 | 70.67                          | 102.80   | 77.36    | 50.43    | 44.75    | 29.89    | 39.50    | 37.36    | 57.92    |
| 4   | Longgang     | LG01         | 9 | 62.25                          | 105.80   | 76.86    | 50.29    | 43.50    | 31.89    | 40.50    | 36.36    | 56.75    |
| 5   | Meisha       | MS01         | 9 | 52.83                          | 51.20    | 56.57    | 42.57    | 32.25    | 26.00    | 31.88    | 29.23    | 43.33    |
| 6   | Yantian      | YT01         | 7 | 44.42                          | 48.40    | -        | 37.71    | 28.00    | -        | 29.38    | 27.68    | 38.75    |
| 7   | Kuiyong      | KY01         | 9 | 58.92                          | 63.60    | 62.86    | 42.43    | 31.25    | 26.67    | 30.25    | 27.18    | 39.83    |
| 8   | Nan’ao       | NA01         | - | -                              | -        | -        | -        | -        | -        | -        | -        | -        |
| 9   | Xixiang      | XX01         | 4 | 71.08                          | 94.80    | -        | -        | -        | 31.11    | 38.63    | -        | -        |
| 10  | Lianhua      | LH01         | 9 | 61.08                          | 71.60    | 64.57    | 44.29    | 43.50    | 29.33    | 35.25    | 32.50    | 46.42    |
| 11  | Tongxinling  | TX01         | 5 | 68.00                          | 83.60    | -        | -        | -        | -        | 33.88    | 30.23    | 45.67    |
| 12  | Honghu       | HH01         | 9 | 70.50                          | 106.60   | 80.50    | 54.14    | 38.75    | 30.33    | 38.38    | 34.05    | 50.83    |
| 13  | Minzhi       | MZ01         | 6 | 77.25                          | 98.80    | 80.79    | 49.00    | 44.75    | -        | 39.00    | -        | -        |
| 14  | Guanlan      | GL01         | 9 | 91.50                          | 144.20   | 99.43    | 60.71    | 47.50    | 32.89    | 40.50    | 47.18    | 71.33    |
| 15  | Pingshan     | PS01         | 9 | 83.50                          | 110.60   | 83.29    | 54.29    | 50.25    | 33.33    | 42.38    | 37.91    | 64.42    |

| Num | Name         | Abbreviation | n | NDVI     |          |          |          |          |          |          |          |          |
|-----|--------------|--------------|---|----------|----------|----------|----------|----------|----------|----------|----------|----------|
|     |              |              |   | Period 1 | Period 2 | Period 3 | Period 4 | Period 5 | Period 6 | Period 7 | Period 8 | Period 9 |
| 1   | Nanhai       | NH01         | 9 | -0.0044  | -0.0237  | -0.0428  | 0.0118   | 0.0198   | 0.0415   | -0.0017  | -0.0026  | 0.0111   |
| 2   | Huaqiaocheng | HQ01         | 9 | -0.0014  | -0.0362  | -0.0034  | -0.0039  | 0.0188   | 0.0340   | -0.0021  | -0.0237  | -0.0338  |
| 3   | Henggang     | HG01         | 9 | 0.0087   | -0.0356  | -0.0303  | 0.0061   | 0.0082   | 0.0367   | 0.0102   | -0.0073  | 0.0113   |
| 4   | Longgang     | LG01         | 9 | -0.0088  | -0.0406  | -0.0171  | 0.0264   | 0.0119   | 0.0447   | 0.0029   | -0.0200  | 0.0145   |
| 5   | Meisha       | MS01         | 9 | -0.0056  | -0.0133  | 0.0155   | -0.0054  | 0.0136   | 0.0228   | -0.0180  | -0.0125  | -0.0469  |
| 6   | Yantian      | YT01         | 7 | 0.0109   | -0.0346  | -        | -0.0072  | 0.0215   | -        | 0.0030   | 0.0207   | 0.0027   |
| 7   | Kuiyong      | KY01         | 9 | 0.0183   | -0.0066  | -0.0126  | 0.0116   | -0.0111  | 0.0293   | 0.0153   | -0.0205  | -0.0144  |
| 8   | Nan'ao       | NA01         | - | -        | -        | -        | -        | -        | -        | -        | -        | -        |
| 9   | Xixiang      | XX01         | 4 | 0.0006   | -0.0393  | -        | -0.0205  | 0.0253   | 0.0400   | -0.0009  | -        | -        |
| 10  | Lianhua      | LH01         | 9 | -0.0066  | -0.0305  | 0.0091   | -0.0087  | 0.0379   | 0.0097   | -0.0130  | -0.0302  | -0.0585  |
| 11  | Tongxinling  | TX01         | 5 | -0.0012  | -0.0307  | -        | -        | -        | -        | -0.0018  | -0.0059  | 0.005    |
| 12  | Honghu       | HH01         | 9 | -0.0098  | -0.0385  | -0.0143  | -0.0005  | 0.0351   | 0.0251   | -0.0167  | 0.0049   | -0.0054  |
| 13  | Minzhi       | MZ01         | 6 | 0.0101   | -0.0402  | -0.0034  | 0.0098   | 0.0016   | -        | 0.0075   | -        | -        |
| 14  | Guanlan      | GL01         | 9 | 0.0007   | -0.0323  | -0.0095  | -0.0023  | 0.0291   | 0.0223   | -0.0150  | -0.0191  | -0.0413  |
| 15  | Pingshan     | PS01         | 9 | -0.0147  | -0.0353  | -0.0178  | 0.0034   | 0.0196   | 0.0387   | -0.0085  | 0.0081   | -0.0242  |

| Num | Name         | Abbreviation | n | Shapiro-Wilk parametric hypothesis test* |                   | Pearson correlation coefficient (PCC) | Root mean square error (RMSE) | Regression slope (RS)  |
|-----|--------------|--------------|---|------------------------------------------|-------------------|---------------------------------------|-------------------------------|------------------------|
|     |              |              |   | p(PM10)                                  | p( $\delta$ NDVI) |                                       |                               |                        |
| 1   | Nanhai       | NH01         | 9 | 0.2815                                   | 0.914             | 0.792                                 | 0.0176                        | $-6.57 \times 10^{-4}$ |
| 2   | Huaqiaocheng | HQ01         | 9 | 0.3879                                   | 0.4896            | 0.397                                 | 0.025                         | $-4.85 \times 10^{-4}$ |
| 3   | Henggang     | HG01         | 9 | 0.4646                                   | 0.228             | 0.791                                 | 0.0161                        | $-7.60 \times 10^{-4}$ |
| 4   | Longgang     | LG01         | 9 | 0.1516                                   | 0.9966            | 0.708                                 | 0.0217                        | $-7.94 \times 10^{-4}$ |
| 5   | Meisha       | MS01         | 9 | 0.3679                                   | 0.8625            | 0.128                                 | 0.0248                        | $-2.42 \times 10^{-4}$ |
| 6   | Yantian      | YT01         | 7 | 0.3117                                   | 0.2095            | 0.742                                 | 0.016                         | $-1.73 \times 10^{-5}$ |
| 7   | Kuiyong      | KY01         | 9 | 0.0659                                   | 0.2799            | 0.124                                 | 0.0207                        | $-1.43 \times 10^{-4}$ |
| 8   | Nan'ao       | NA01         | - | -                                        | -                 | -                                     | -                             | -                      |
| 9   | Xixiang      | XX01         | 4 | 0.5516                                   | 0.7349            | 0.869                                 | 0.024                         | $-9.53 \times 10^{-4}$ |
| 10  | Lianhua      | LH01         | 9 | 0.4334                                   | 0.9526            | 0.084                                 | 0.0329                        | $-1.59 \times 10^{-4}$ |
| 11  | Tongxinling  | TX01         | 5 | 0.4746                                   | 0.0892            | 0.671                                 | 0.014                         | $-4.06 \times 10^{-4}$ |
| 12  | Honghu       | HH01         | 9 | 0.2108                                   | 0.8398            | 0.772                                 | 0.0166                        | $-6.75 \times 10^{-4}$ |
| 13  | Minzhi       | MZ01         | 6 | 0.3983                                   | 0.1153            | 0.724                                 | 0.0171                        | $-5.80 \times 10^{-4}$ |
| 14  | Guanlan      | GL01         | 9 | 0.2416                                   | 0.8648            | 0.493                                 | 0.0237                        | $-3.20 \times 10^{-4}$ |
| 15  | Pingshan     | PS01         | 9 | 0.4165                                   | 0.9188            | 0.811                                 | 0.016                         | $-7.32 \times 10^{-4}$ |

\*The missing data failed to pass availability tests. All the samples have passed Shapiro-Wilk parametric hypothesis test.

**Figure S1.** Fitting curves of 14 stations between their atmospheric PM10 concentrations and the normalized difference vegetation index ( $\delta$ NDVI). They were separated from

Figure 5.

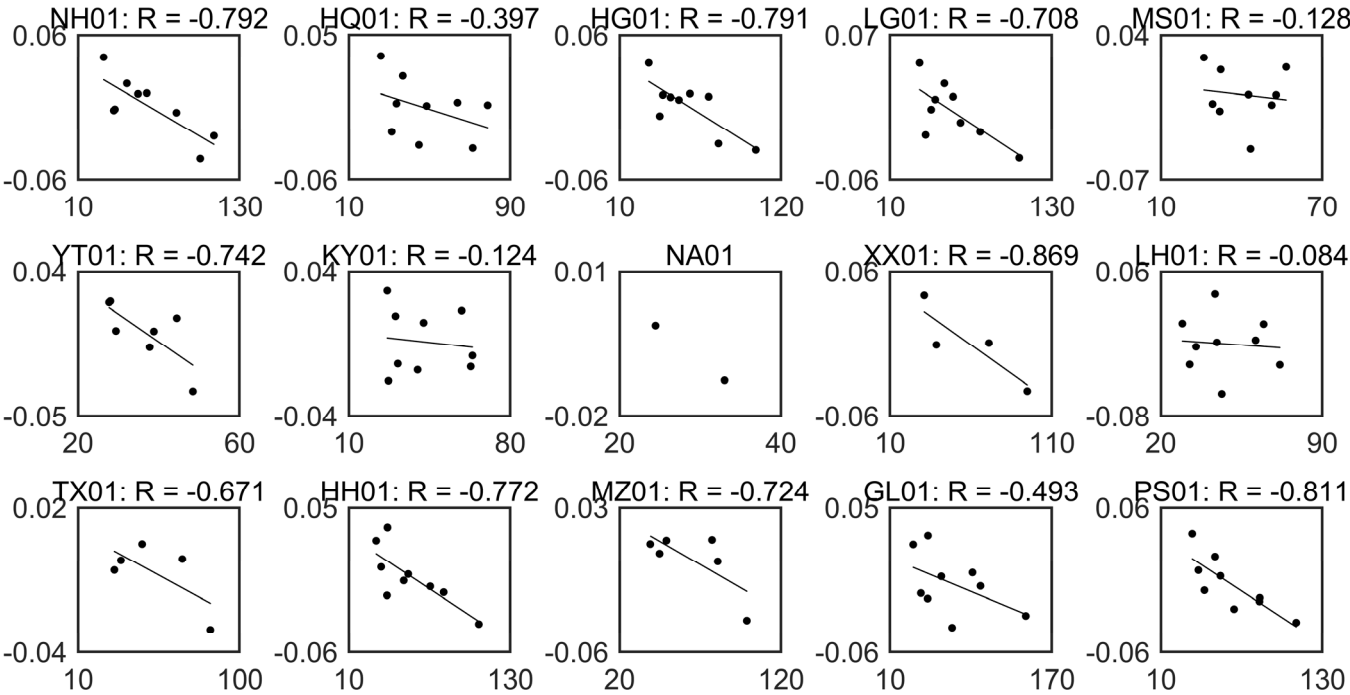

Supplement: s1 [file s1]
